# Supplementary material for: Understanding Constraints and Enablers of Climate Risk Management Strategies: Evidence from Smallholder Dairy Farmers in Regional South India
Source: MDPI journal article supplement (doi:10.3390/su16052018), 2024-02-29
Supplement: s1 [file s1]

## Supplementary Figures

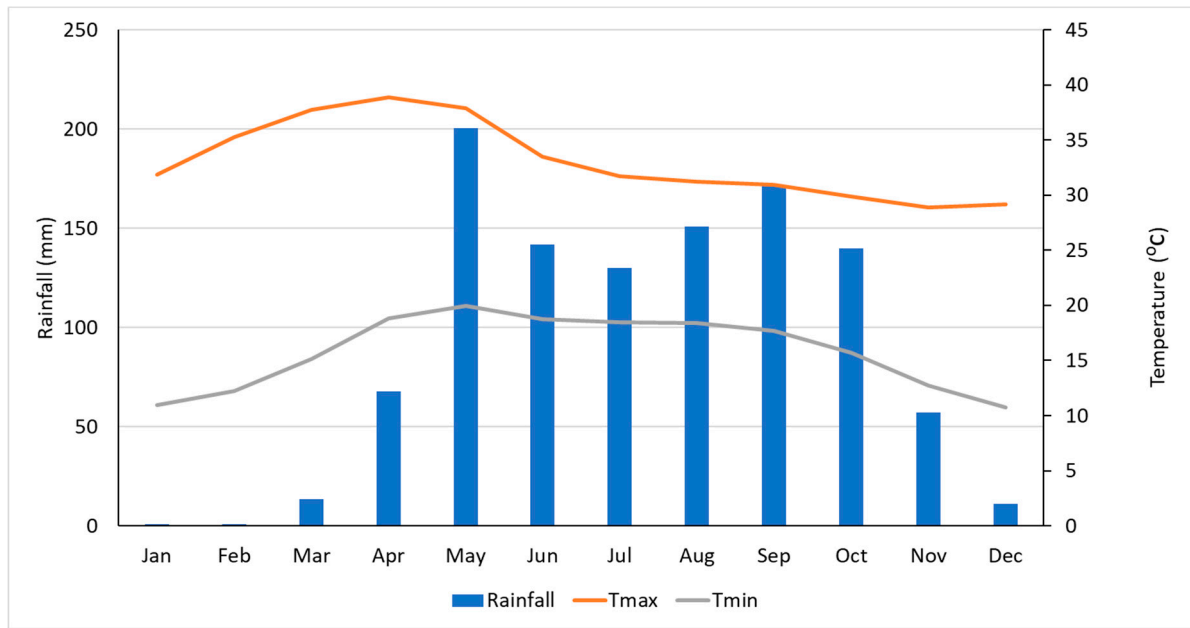

**Figure S1.** Mean monthly rainfall and temperature in the study area (data presented is the average of 2000-2022).

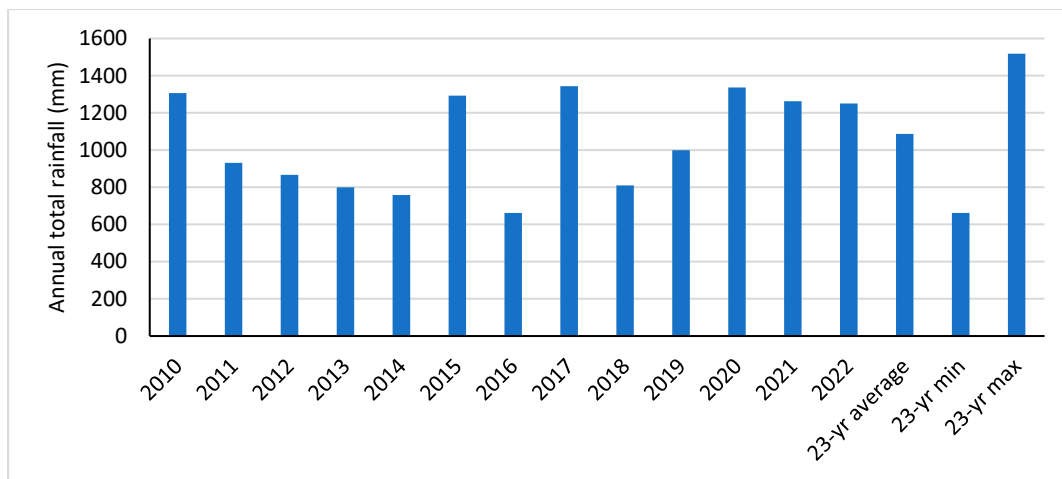

**Figure S2.** Annual total rainfall in the study area
